# Supplementary material for: Linoleic Acid Induced Changes in SZ95 Sebocytes—Comparison with Palmitic Acid and Arachidonic Acid
Source: MDPI journal article supplement (doi:10.3390/nu15153315), 2023-07-26
Supplement: s1 [file s1]

**Supplementary Figure S1.**

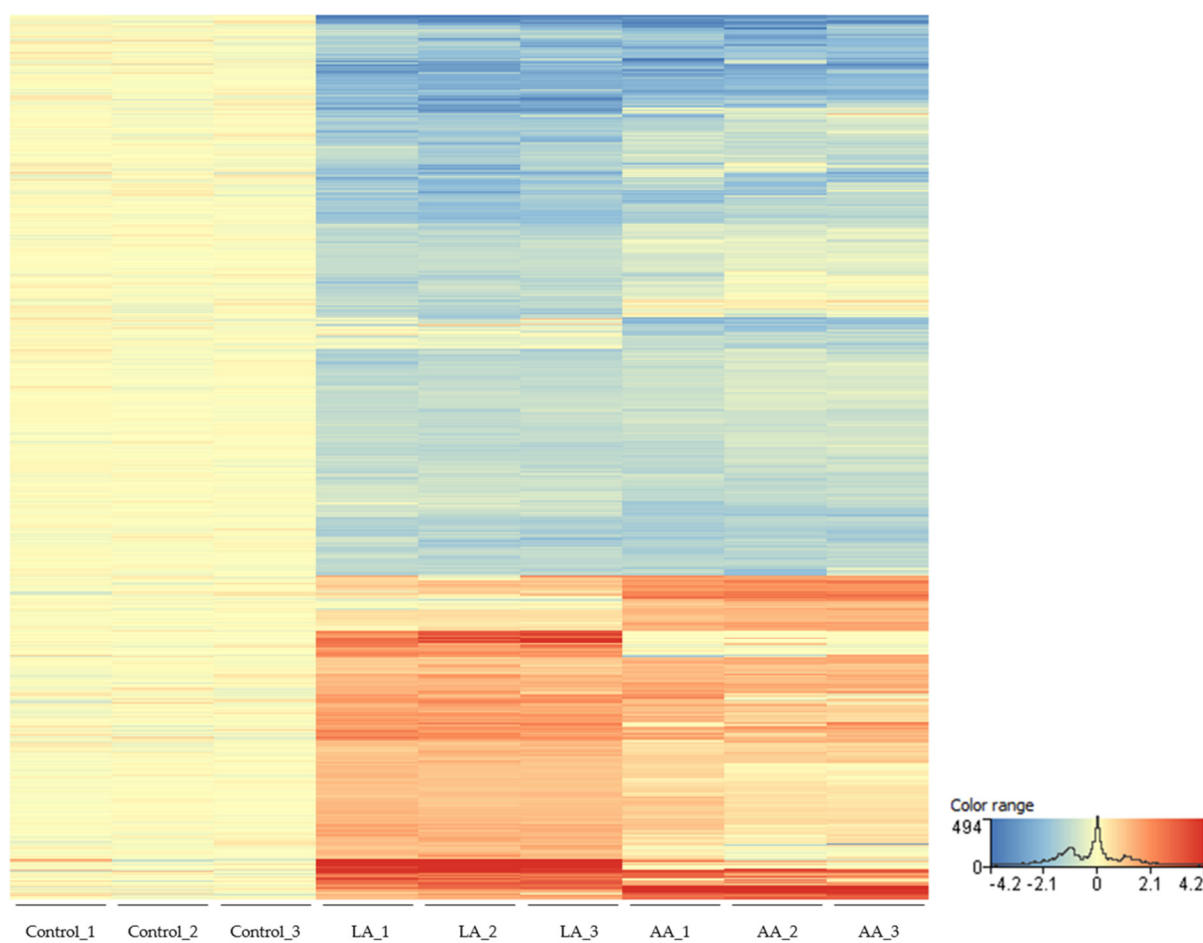

**Supplementary Figure S1.** Heat map showing the replicates separately to support the heat map in Figure 5, which shows mean averages. Color intensities reflect the ratio of signal intensities as shown.
