# Supplementary material for: Linoleic Acid Induced Changes in SZ95 Sebocytes—Comparison with Palmitic Acid and Arachidonic Acid
Source: MDPI journal article supplement (doi:10.3390/nu15153315), 2023-07-26
Supplement: s1 [file s1]

Supplementary Figure S3.

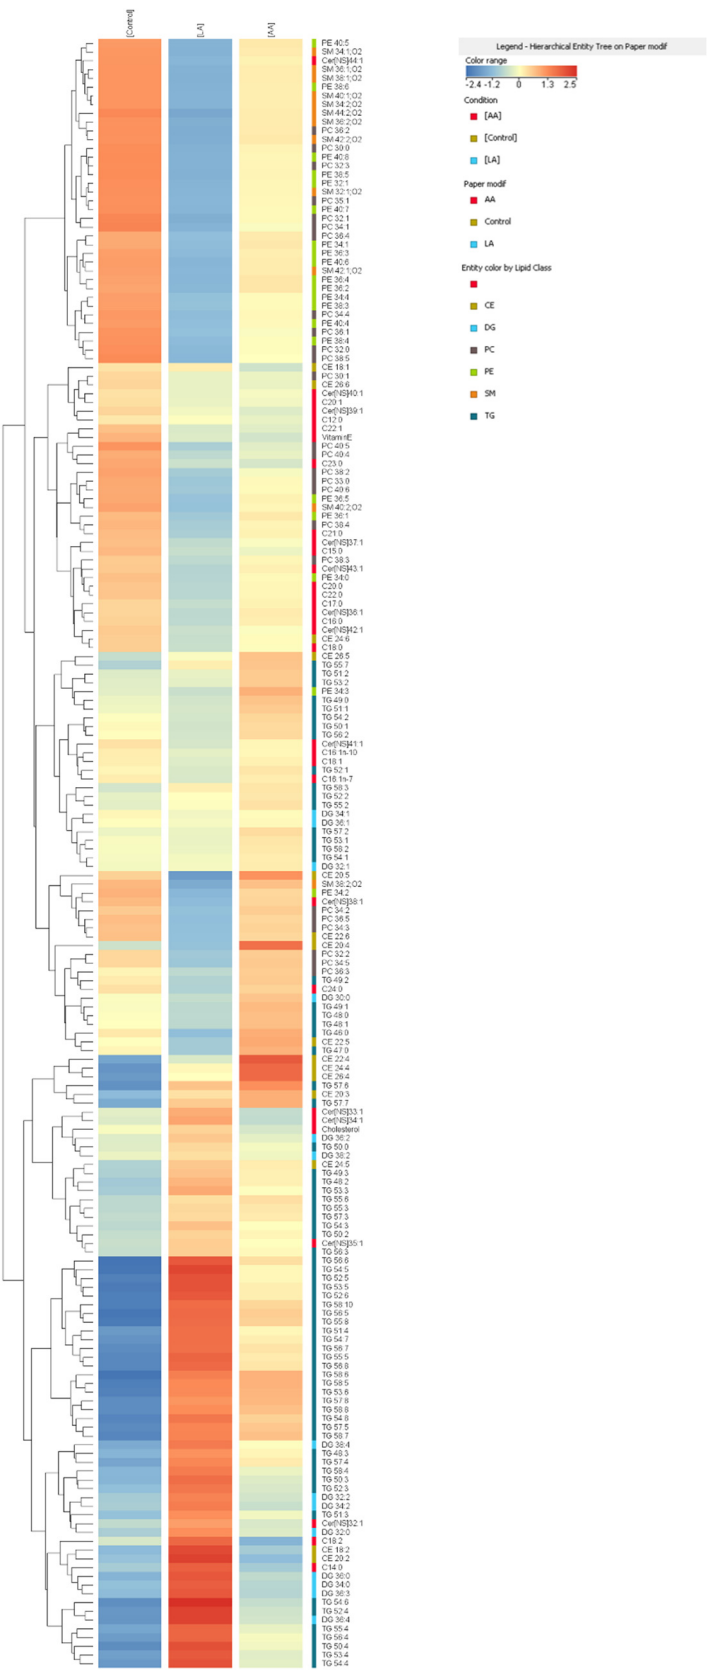

Supplementary Figure S3. Hierarchical clustering tree of measured lipids in SZ95 sebocytes treated with AA or LA for 24 h. Note that the majority of lipids changed their amounts in opposite

directions, while the lipids that were up- or down-regulated in both treatment conditions are enlarged in brackets.

Clustering:

Experiment: SZ95\_All Lipidomics Data

Clustering Algorithm: Hierarchical

Clustered by: Normalized intensity values

Clustered On: Entities

Similarity Measure: Euclidean

Linkage Rule: Wards
