# Supplementary material for: Linoleic Acid Induced Changes in SZ95 Sebocytes—Comparison with Palmitic Acid and Arachidonic Acid
Source: Nutrients. 2023 Jul 26;15(15):3315. doi: 10.3390/nu15153315 (PMC10420848; doi:10.3390/nu15153315)
Supplement: Supplementary file 1 [file nutrients-15-03315-s001.zip › Supplementary Table S1.xlsx]

## Sheet: VennDiagram
Treatment	Compound	Lipid Class	*C-Atoms	*DBs	FC (LA vs vehicle)	Log FC (LA vs vehicle)	Regulation (LA vs vehicle)	Mass	Retention Time	Treatment	Compound	Lipid Class	*C-Atoms	*DBs	FC (AA vs vehicle)	Log FC (AA vs vehicle)	Regulation (AA vs vehicle)	Lipid Class	Mass	Retention Time
LA	C14:0	FFA	14	0	7.0338	2.8143	up	285.2	15.444	AA
LA	C18:2	FFA	18	2	4.54178	2.18326	up	337.2	20.037	AA
LA	CE 18:2	CE	18	2	10.5849	3.40394	up	648.577	13.44	AA
LA	CE 20:2	CE	20	2	10.6438	3.41194	up	676.612	13.85	AA
LA	CE 20:3	CE	20	3	2.93154	1.55166	up	674.596	13.51	AA	CE 20:3	CE	20	3	4.36057	2.12452	up	CE	674.596	13.51
LA										AA	CE 20:4	CE	20	4	4.47892	2.16315	up	CE	672.583	13.25
LA	CE 22:4	CE	22	4	2.29002	1.19536	up	700.614	13.58	AA	CE 22:4	CE	22	4	11.6814	3.54614	up	CE	700.614	13.58
LA	CE 24:4	CE	24	4	3.77023	1.91465	up	728.645	14.02	AA	CE 24:4	CE	24	4	11.9898	3.58373	up	CE	728.645	14.02
LA	CE 24:5	CE	24	5	2.71001	1.4383	up	726.63	13.71	AA	CE 24:5	CE	24	5	2.03025	1.02165	up	CE	726.63	13.71
LA	CE 26:4	CE	26	4	3.39086	1.76165	up	756.676	14.56	AA	CE 26:4	CE	26	4	11.2894	3.49689	up	CE	756.676	14.56
LA										AA	CE 26:5	CE	26	5	2.431	1.28155	up	CE	754.66	14.16
LA	Cer[NS]32:1	Cer	32	1	3.34167	1.74057	up	509.48	10.97	AA
LA	Cer[NS]33:1	Cer	33	1	2.30741	1.20628	up	523.495	11.08	AA
LA	Cer[NS]34:1	Cer	34	1	2.55683	1.35435	up	537.511	11.22	AA
LA	Cer[NS]35:1	Cer	35	1	2.18668	1.12875	up	551.532	11.42	AA
LA	DG 32:0	DG	32	0	4.37969	2.13083	up	568.506	11.69	AA
LA	DG 32:2	DG	32	2	5.11357	2.35433	up	564.472	11.38	AA
LA	DG 34:0	DG	34	0	8.23105	3.04108	up	596.535	11.89	AA
LA	DG 34:2	DG	34	2	5.22173	2.38453	up	592.506	11.6	AA
LA	DG 36:0	DG	36	0	10.1469	3.34296	up	624.566	12.07	AA
LA	DG 36:3	DG	36	3	9.23548	3.20719	up	618.52	11.65	AA
LA	DG 36:4	DG	36	4	17.1696	4.10179	up	616.504	11.56	AA	DG 36:4	DG	36	4	2.56049	1.35642	up	DG	616.504	11.56
LA	DG 38:4	DG	38	4	8.10516	3.01884	up	644.535	11.77	AA	DG 38:4	DG	38	4	2.79304	1.48183	up	DG	644.535	11.77
LA										AA	PE 34:3	PE	34	3	2.22693	1.15505	up	PE	713.506	10.63
LA	TG 48:2	TG	48	2	3.46971	1.79482	up	802.704	12.88	AA
LA	TG 48:3	TG	48	3	5.79287	2.53428	up	800.685	12.71	AA	TG 48:3	TG	48	3	2.7075	1.43696	up	TG	800.685	12.71
LA	TG 49:3	TG	49	3	2.8735	1.52281	up	814.693	12.79	AA
LA	TG 50:3	TG	50	3	8.14282	3.02553	up	828.719	12.92	AA
LA	TG 50:4	TG	50	4	16.7096	4.06261	up	826.703	12.78	AA	TG 50:4	TG	50	4	3.52858	1.81909	up	TG	826.703	12.78
LA	TG 51:3	TG	51	3	5.11282	2.35412	up	842.734	13.05	AA
LA	TG 51:4	TG	51	4	10.6972	3.41917	up	840.718	12.89	AA	TG 51:4	TG	51	4	3.55884	1.83141	up	TG	840.718	12.89
LA	TG 52:3	TG	52	3	6.61469	2.72567	up	856.752	13.17	AA
LA	TG 52:4	TG	52	4	17.0015	4.08759	up	854.734	12.98	AA	TG 52:4	TG	52	4	2.4372	1.28523	up	TG	854.734	12.98
LA	TG 52:5	TG	52	5	18.5019	4.2096	up	852.718	12.83	AA	TG 52:5	TG	52	5	4.68231	2.22722	up	TG	852.718	12.83
LA	TG 52:6	TG	52	6	17.9657	4.16717	up	850.703	12.68	AA	TG 52:6	TG	52	6	5.08634	2.34663	up	TG	850.703	12.68
LA	TG 53:3	TG	53	3	3.6521	1.86873	up	870.766	13.32	AA
LA	TG 53:4	TG	53	4	12.2468	3.61434	up	868.75	13.09	AA	TG 53:4	TG	53	4	2.53079	1.33959	up	TG	868.75	13.09
LA	TG 53:5	TG	53	5	19.6475	4.29628	up	866.733	12.94	AA	TG 53:5	TG	53	5	5.31653	2.41049	up	TG	866.733	12.94
LA	TG 53:6	TG	53	6	10.9148	3.44822	up	864.721	12.74	AA	TG 53:6	TG	53	6	7.69159	2.94328	up	TG	864.721	12.74
LA	TG 54:3	TG	54	3	2.64785	1.40482	up	884.784	13.47	AA
LA	TG 54:4	TG	54	4	14.3153	3.83949	up	882.767	13.23	AA	TG 54:4	TG	54	4	2.81376	1.4925	up	TG	882.767	13.23
LA	TG 54:5	TG	54	5	23.2265	4.5377	up	880.75	13.07	AA	TG 54:5	TG	54	5	5.27682	2.39967	up	TG	880.75	13.07
LA	TG 54:6	TG	54	6	22.1376	4.46843	up	878.735	12.89	AA	TG 54:6	TG	54	6	2.50367	1.32405	up	TG	878.735	12.89
LA	TG 54:7	TG	54	7	11.4767	3.52063	up	876.718	12.75	AA	TG 54:7	TG	54	7	4.07771	2.02776	up	TG	876.718	12.75
LA	TG 54:8	TG	54	8	12.4157	3.6341	up	874.701	12.83	AA	TG 54:8	TG	54	8	5.93563	2.5694	up	TG	874.701	12.83
LA	TG 55:4	TG	55	4	10.2911	3.36333	up	896.78	13.37	AA	TG 55:4	TG	55	4	2.48296	1.31206	up	TG	896.78	13.37
LA	TG 55:5	TG	55	5	14.5328	3.86124	up	894.765	13.18	AA	TG 55:5	TG	55	5	4.84084	2.27526	up	TG	894.765	13.18
LA	TG 55:8	TG	55	8	15.5435	3.95824	up	888.72	12.95	AA	TG 55:8	TG	55	8	6.66958	2.73759	up	TG	888.72	12.95
LA	TG 56:4	TG	56	4	11.6272	3.53944	up	910.798	13.55	AA	TG 56:4	TG	56	4	3.14769	1.65429	up	TG	910.798	13.55
LA	TG 56:5	TG	56	5	16.4576	4.04068	up	908.783	13.31	AA	TG 56:5	TG	56	5	7.25726	2.85943	up	TG	908.783	13.31
LA	TG 56:6	TG	56	6	20.4019	4.35063	up	906.767	13.11	AA	TG 56:6	TG	56	6	6.5618	2.71409	up	TG	906.767	13.11
LA	TG 56:7	TG	56	7	12.4347	3.6363	up	904.751	12.98	AA	TG 56:7	TG	56	7	4.81527	2.26762	up	TG	904.751	12.98
LA	TG 56:8	TG	56	8	13.8731	3.79422	up	902.733	13.08	AA	TG 56:8	TG	56	8	5.01427	2.32604	up	TG	902.733	13.08
LA	TG 57:4	TG	57	4	7.50685	2.90821	up	924.807	13.71	AA	TG 57:4	TG	57	4	3.467	1.79369	up	TG	924.807	13.71
LA	TG 57:5	TG	57	5	10.3601	3.37297	up	922.797	13.45	AA	TG 57:5	TG	57	5	6.18811	2.6295	up	TG	922.797	13.45
LA	TG 57:6	TG	57	6	5.81568	2.53995	up	920.781	13.23	AA	TG 57:6	TG	57	6	8.75893	3.13076	up	TG	920.781	13.23
LA	TG 57:7	TG	57	7	4.22589	2.07925	up	918.765	13.04	AA	TG 57:7	TG	57	7	5.22199	2.3846	up	TG	918.765	13.04
LA	TG 57:8	TG	57	8	8.67233	3.11642	up	916.749	12.91	AA	TG 57:8	TG	57	8	6.66015	2.73555	up	TG	916.749	12.91
LA	TG 58:10	TG	58	10	14.6575	3.87357	up	926.733	12.71	AA	TG 58:10	TG	58	10	6.12186	2.61397	up	TG	926.733	12.71
LA	TG 58:4	TG	58	4	6.97965	2.80315	up	938.831	13.9	AA
LA	TG 58:5	TG	58	5	11.0345	3.46395	up	936.815	13.61	AA	TG 58:5	TG	58	5	8.10785	3.01932	up	TG	936.815	13.61
LA	TG 58:6	TG	58	6	13.8532	3.79215	up	934.798	13.37	AA	TG 58:6	TG	58	6	9.08086	3.18283	up	TG	934.798	13.37
LA	TG 58:7	TG	58	7	11.0926	3.47153	up	932.782	13.15	AA	TG 58:7	TG	58	7	6.76316	2.7577	up	TG	932.782	13.15
LA	TG 58:8	TG	58	8	9.26222	3.21136	up	930.767	13.02	AA	TG 58:8	TG	58	8	6.25829	2.64577	up	TG	930.767	13.02
Treatment	Compound	Lipid Class	*C-Atoms	*DBs	FC (LA vs vehicle)	Log FC (LA vs vehicle)	Regulation (LA vs vehicle)	Mass	Retention Time	Treatment	Compound	Lipid Class	*C-Atoms	*DBs	FC (AA vs vehicle)	Log FC (AA vs vehicle)	Regulation (AA vs vehicle)	Lipid Class	Mass	Retention Time
LA	C15:0	FFA	15	0	-2.56584	-1.35943	down	299.2	16.864	AA
LA	C16:0	FFA	16	0	-2.27596	-1.18647	down	313.2	18.172	AA
LA	C17:0	FFA	17	0	-2.11478	-1.08051	down	327.3	19.325	AA
LA	C18:0	FFA	18	0	-2.17889	-1.12359	down	341.3	20.38	AA
LA	C20:0	FFA	20	0	-2.58989	-1.37289	down	369.3	22.241	AA
LA	C21:0	FFA	21	0	-3.12051	-1.64178	down	383.3	23.15	AA
LA	C22:0	FFA	22	0	-2.60998	-1.38404	down	397.3	23.885	AA
LA	C22:1	FFA	22	1	-2.117	-1.08202	down	395.6	23.714	AA
LA	C23:0	FFA	23	0	-2.87137	-1.52174	down	411.4	24.6627	AA	C23:0	FFA	23	0	-2.66577	-1.41455	down	FFA	411.4	24.6627
LA	C24:0	FFA	24	0	-2.22202	-1.15187	down	425.7	25.3875	AA
LA	CE 20:5	CE	20	5	-4.69357	-2.23069	down	670.566	13.01	AA
LA	CE 22:6	CE	22	6	-3.5878	-1.8431	down	696.583	13.09	AA
LA	CE 24:6	CE	24	6	-2.18395	-1.12694	down	724.614	13.38	AA
LA	Cer[NS]36:1	Cer	36	1	-2.2549	-1.17307	down	565.549	11.46	AA
LA	Cer[NS]37:1	Cer	37	1	-2.58953	-1.37269	down	579.566	11.65	AA
LA	Cer[NS]38:1	Cer	38	1	-3.98297	-1.99384	down	593.584	11.68	AA
LA	Cer[NS]42:1	Cer	42	1	-2.18711	-1.12903	down	649.635	12.06	AA
LA	Cer[NS]43:1	Cer	43	1	-2.61746	-1.38817	down	663.652	12.16	AA
LA	Cer[NS]44:1	Cer	44	1	-5.55499	-2.47378	down	677.667	12.25	AA	Cer[NS]44:1	Cer	44	1	-2.03001	-1.02148	down	Cer	677.667	12.25
LA	PC 30:0	PC	30	0	-6.27255	-2.64905	down	705.531	14.25	AA	PC 30:0	PC	30	0	-2.1701	-1.11776	down	PC	705.531	14.25
LA	PC 32:0	PC	32	0	-5.72378	-2.51697	down	733.562	14.17	AA	PC 32:0	PC	32	0	-2.29857	-1.20074	down	PC	733.562	14.17
LA	PC 32:1	PC	32	1	-6.86905	-2.78011	down	731.547	14.13	AA	PC 32:1	PC	32	1	-2.43657	-1.28485	down	PC	731.547	14.13
LA	PC 32:2	PC	32	2	-2.73023	-1.44902	down	729.531	14.11	AA
LA	PC 32:3	PC	32	3	-6.19555	-2.63123	down	727.512	14.24	AA
LA	PC 33:0	PC	33	0	-3.99029	-1.99649	down	747.592	14.13	AA
LA	PC 34:1	PC	34	1	-6.6761	-2.73901	down	759.579	14.03	AA	PC 34:1	PC	34	1	-2.71432	-1.44059	down	PC	759.579	14.03
LA	PC 34:2	PC	34	2	-3.2875	-1.71699	down	757.563	14.03	AA
LA	PC 34:3	PC	34	3	-3.5715	-1.83653	down	755.545	14.11	AA
LA	PC 34:4	PC	34	4	-5.15228	-2.36521	down	753.528	14.1	AA	PC 34:4	PC	34	4	-2.08723	-1.06159	down	PC	753.528	14.1
LA	PC 34:5	PC	34	5	-2.79178	-1.48118	down	751.513	14.09	AA
LA	PC 35:1	PC	35	1	-5.82064	-2.54118	down	773.593	14.01	AA	PC 35:1	PC	35	1	-2.19741	-1.13581	down	PC	773.593	14.01
LA	PC 36:1	PC	36	1	-5.05168	-2.33676	down	787.606	13.95	AA	PC 36:1	PC	36	1	-2.37803	-1.24976	down	PC	787.606	13.95
LA	PC 36:2	PC	36	2	-6.37263	-2.67189	down	785.594	13.94	AA	PC 36:2	PC	36	2	-2.00206	-1.00149	down	PC	785.594	13.94
LA	PC 36:4	PC	36	4	-4.35332	-2.12212	down	781.562	14.01	AA
LA	PC 36:5	PC	36	5	-3.74936	-1.90664	down	779.545	14.02	AA
LA	PC 38:2	PC	38	2	-3.95014	-1.9819	down	813.619	13.9	AA	PC 38:2	PC	38	2	-2.15398	-1.107	down	PC	813.619	13.9
LA	PC 38:3	PC	38	3	-2.40957	-1.26877	down	811.603	13.91	AA
LA	PC 38:4	PC	38	4	-3.31947	-1.73095	down	809.593	13.92	AA
LA	PC 38:5	PC	38	5	-5.96722	-2.57706	down	807.576	13.92	AA	PC 38:5	PC	38	5	-2.41835	-1.27402	down	PC	807.576	13.92
LA	PC 40:4	PC	40	4	-3.06252	-1.61472	down	837.62	13.84	AA
LA	PC 40:5	PC	40	5	-4.23803	-2.08339	down	835.606	13.85	AA	PC 40:5	PC	40	5	-2.84882	-1.51036	down	PC	835.606	13.85
LA	PC 40:6	PC	40	6	-3.85005	-1.94488	down	833.59	13.83	AA
LA	PE 32:1	PE	32	1	-6.0277	-2.59161	down	689.501	10.73	AA	PE 32:1	PE	32	1	-2.22308	-1.15256	down	PE	689.501	10.73
LA	PE 34:0	PE	34	0	-2.76316	-1.46632	down	719.545	10.7	AA
LA	PE 34:1	PE	34	1	-4.44953	-2.15365	down	717.531	10.7	AA
LA	PE 34:2	PE	34	2	-4.43749	-2.14974	down	715.516	10.65	AA
LA	PE 34:4	PE	34	4	-4.63903	-2.21382	down	711.483	10.74	AA
LA	PE 36:1	PE	36	1	-3.37673	-1.75562	down	745.56	10.68	AA
LA	PE 36:2	PE	36	2	-4.88794	-2.28923	down	743.546	10.6	AA
LA	PE 36:3	PE	36	3	-4.94212	-2.30513	down	741.531	10.37	AA
LA	PE 36:4	PE	36	4	-5.08744	-2.34694	down	739.514	10.5	AA
LA	PE 36:5	PE	36	5	-4.2144	-2.07533	down	737.509	10.55	AA
LA	PE 38:3	PE	38	3	-4.52962	-2.17939	down	769.561	10.36	AA	PE 38:3	PE	38	3	-2.01804	-1.01296	down	PE	769.561	10.36
LA	PE 38:4	PE	38	4	-5.40431	-2.43411	down	767.546	10.42	AA	PE 38:4	PE	38	4	-2.25059	-1.17031	down	PE	767.546	10.42
LA	PE 38:5	PE	38	5	-6.29942	-2.65522	down	765.53	10.33	AA	PE 38:5	PE	38	5	-2.21024	-1.1442	down	PE	765.53	10.33
LA	PE 38:6	PE	38	6	-5.88768	-2.5577	down	763.514	10.4	AA	PE 38:6	PE	38	6	-2.01215	-1.00874	down	PE	763.514	10.4
LA	PE 40:4	PE	40	4	-4.87504	-2.28541	down	795.576	10.35	AA	PE 40:4	PE	40	4	-2.0741	-1.05248	down	PE	795.576	10.35
LA	PE 40:5	PE	40	5	-5.58185	-2.48074	down	793.561	10.31	AA
LA	PE 40:6	PE	40	6	-5.40035	-2.43305	down	791.544	10.34	AA
LA	PE 40:7	PE	40	7	-5.87744	-2.55519	down	789.528	10.34	AA	PE 40:7	PE	40	7	-2.23122	-1.15783	down	PE	789.528	10.34
LA	PE 40:8	PE	40	8	-6.27555	-2.64974	down	787.512	10.31	AA	PE 40:8	PE	40	8	-2.24185	-1.16469	down	PE	787.512	10.31
LA	SM 32:1;O2	SM	32	1	-5.91995	-2.56559	down	674.536	15.72	AA
LA	SM 34:1;O2	SM	34	1	-5.73858	-2.52069	down	702.568	15.6	AA
LA	SM 34:2;O2	SM	34	2	-5.7687	-2.52825	down	700.55	15.62	AA
LA	SM 36:1;O2	SM	36	1	-5.89156	-2.55865	down	730.598	15.5	AA
LA	SM 36:2;O2	SM	36	2	-6.18759	-2.62938	down	728.582	15.5	AA
LA	SM 38:1;O2	SM	38	1	-5.98088	-2.58036	down	758.628	15.38	AA
LA	SM 38:2;O2	SM	38	2	-4.81578	-2.26777	down	756.613	15.4	AA
LA	SM 40:1;O2	SM	40	1	-5.78258	-2.53171	down	786.66	15.29	AA	SM 40:1;O2	SM	40	1	-2.01261	-1.00907	down	SM	786.66	15.29
LA	SM 40:2;O2	SM	40	2	-4.45875	-2.15664	down	784.644	15.29	AA
LA	SM 42:1;O2	SM	42	1	-5.13631	-2.36073	down	814.689	15.19	AA
LA	SM 42:2;O2	SM	42	2	-6.25592	-2.64522	down	812.677	15.22	AA
LA	SM 44:2;O2	SM	44	2	-7.30838	-2.86955	down	840.706	15.13	AA	SM 44:2;O2	SM	44	2	-2.15397	-1.107	down	SM	840.706	15.13
LA	TG 46:0	TG	46	0	-2.67853	-1.42144	down	778.702	13.02	AA
LA	VitaminE	PR			-2.26839	-1.18167	down	502.5	27.441	AA	VitaminE	PR			-2.45872	-1.29791	down	PR	502.5	27.441
*C-Atoms and DBs are referred to FAs composing CEs, TGs, DG, PCs, and PEs, while C-Atoms and DBs referred to both moieties of ceramides and SMs, i.e. the sphingoid base and the FA.
